# Supplementary material
Source: PubMed Central journal article supplement (PMC544053)

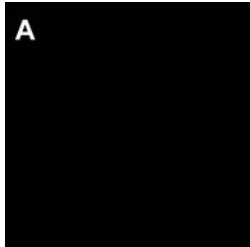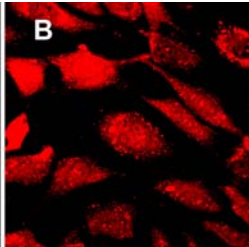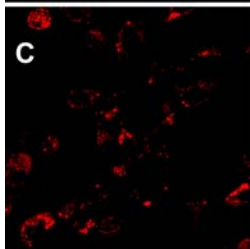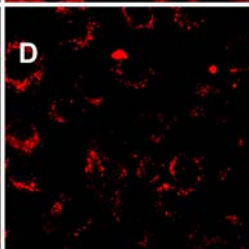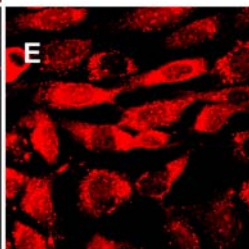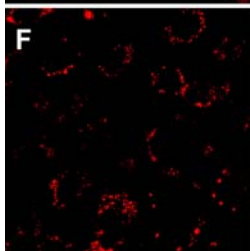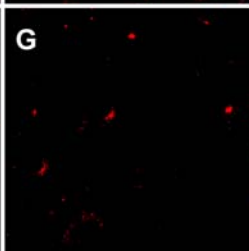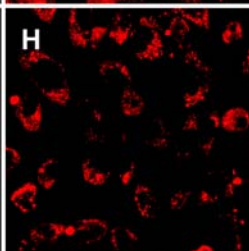

Supplement: pnas_102_1_117__3.pdf [file pnas_102_1_117__3.pdf]
